# Supplementary material for: MASTL is enriched in cancerous and pluripotent stem cells and influences OCT1/OCT4 levels
Source: PubMed Central journal article supplement — iScience. 2022 May 25;25(6):104459. doi: 10.1016/j.isci.2022.104459 (PMC9167974; doi:10.1016/j.isci.2022.104459), 2022-05-25
Supplement: mmc1.pdf [file mmc1.pdf]

**Supplemental information**

**MASTL is enriched in cancerous and pluripotent  
stem cells and influences OCT1/OCT4 levels**

**Elisa Närvä, Maria E. Taskinen, Sergio Lilla, Aleksu Isomursu, Mika Pietilä, Jere Weltner, Jorma Isola, Harri Sihto, Heikki Joensuu, Sara Zanivan, Jim Norman, and Johanna Ivaska**

| A                         |     |                |                |                           | B                         |            |                |                |                   |
|---------------------------|-----|----------------|----------------|---------------------------|---------------------------|------------|----------------|----------------|-------------------|
|                           | n   | MASTL Negative | MASTL Positive | chi-square test P         |                           | n          | ITGB3 Negative | ITGB3 Positive | chi-square test P |
| <b>Age (years)</b>        | 851 |                |                |                           | <b>Primary tumor size</b> |            |                |                |                   |
| Median (51)               |     | 51             | 50             | 0.0800                    | pT1                       | 314        | 273 (86.9)     | 41 (13.1)      | <b>0.024</b>      |
| <b>Tumor size (mm)</b>    | 839 |                |                |                           | pT2-4                     | 447        | 361 (80.8)     | 86 (19.2)      |                   |
| Median (12)               |     | 22             | 22             | 0.5370                    | <b>Nodal status</b>       |            |                |                |                   |
| N.A.                      |     |                |                |                           | negative                  | 85         | 60 (70.6)      | 25 (29.4)      | <b>0.001</b>      |
| <b>Ki-67 (%)</b>          | 794 |                |                |                           | positive                  | 675        | 573 (84.9)     | 102 (15.1)     |                   |
| Median (19.6)             |     | 17.1           | 38.2           | <b>0.0001</b>             | N.A.                      | 1          | 1              | 0              |                   |
| N.A.                      | 57  |                |                |                           | <b>Histological type</b>  |            |                |                |                   |
| <b>Tumor size</b>         |     |                |                |                           | Ductal                    | 607        | 490 (80.7)     | 117 (19.3)     | <b>0.001</b>      |
| pT1                       | 362 | 292 (80.7)     | 70 (19.3)      | 0.4940                    | Lobular                   | 137        | 127 (92.7)     | 10 (7.3)       |                   |
| pT2                       | 418 | 334 (79.9)     | 84 (20.1)      |                           | Special type              | 17         | 10 (100)       | 0              |                   |
| pT3 or pT4                | 71  | 61 (85.9)      | 10 (14.1)      |                           | <b>Histological grade</b> |            |                |                |                   |
| <b>Nodal status</b>       |     |                |                |                           | Grade 1                   | 95         | 89 (93.7)      | 6 (6.3)        | <b>0.001</b>      |
| pN0                       | 87  | 63 (72.4)      | 24 (27.6)      | Grade 2                   | 307                       | 269 (87.6) | 38 (12.4)      |                |                   |
| pN+                       | 764 | 624 (81.7)     | 140 (18.3)     | Grade 3                   | 328                       | 248 (75.6) | 80 (24.4)      |                |                   |
| N.A.                      |     |                |                | N.A.                      |                           | 28         | 3              |                |                   |
| <b>Histological grade</b> |     |                |                |                           | <b>ER status</b>          |            |                |                |                   |
| 1                         | 117 | 108 (92.3)     | 9 (7.7)        | <b>0.0001</b>             | Positive                  | 530        | 477 (90.0)     | 53 (10.0)      | <b>0.001</b>      |
| 2                         | 341 | 283 (83.0)     | 58 (17.0)      |                           | Negative                  | 231        | 157 (68.0)     | 74 (32.0)      |                   |
| 3                         | 357 | 262 (73.4)     | 95 (26.6)      |                           | <b>PR status</b>          |            |                |                |                   |
| N.A.                      | 36  |                |                |                           | Positive                  | 432        | 392 (90.7)     | 40 (9.3)       | <b>0.001</b>      |
| <b>Tumor histology</b>    |     |                |                | Negative                  | 328                       | 241 (73.5) | 87 (26.5)      |                |                   |
| Ductal                    | 674 | 523 (77.6)     | 151 (22.4)     | N.A.                      |                           | 1          | 0              |                |                   |
| Lobular                   | 158 | 150 (94.9)     | 8 (5.1)        | <b>HER2 status (CISH)</b> |                           |            |                |                |                   |
| Special type              | 19  | 14 (73.7)      | 5 (26.3)       | Negative                  | 587                       | 503 (85.7) | 84 (14.3)      | <b>0.001</b>   |                   |
| <b>p53</b>                |     |                |                | Positive                  | 174                       | 131 (75.3) | 43 (24.7)      |                |                   |
| Negative                  | 620 | 401 (84.0)     | 217 (16.0)     | <b>Ki-67</b>              |                           |            |                |                |                   |
| Positive                  | 208 | 103 (70.2)     | 108 (29.8)     | ≤15%                      | 238                       | 211 (88.7) | 27 (11.3)      | <b>0.001</b>   |                   |
| N.A.                      | 23  |                |                | >15%                      | 436                       | 343 (78.7) | 93 (21.3)      |                |                   |
|                           |     |                |                | N.A.                      | 87                        | 80         | 7              |                |                   |
|                           |     |                |                | <b>p53</b>                |                           |            |                |                |                   |
|                           |     |                |                | Negative                  | 543                       | 468 (86.2) | 75 (13.8)      | <b>0.001</b>   |                   |
|                           |     |                |                | Positive                  | 197                       | 145 (73.6) | 52 (26.4)      |                |                   |
|                           |     |                |                | N.A.                      | 21                        | 21         | 0              |                |                   |

FinHer Breast cancer series

FinHer Breast cancer series

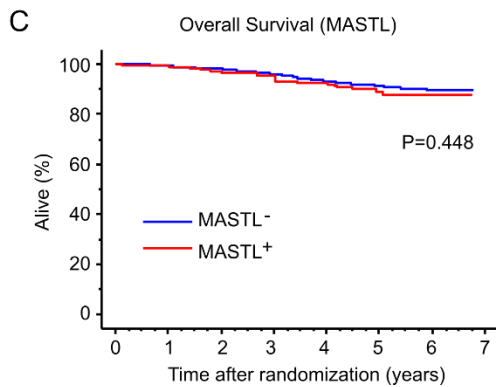

**Figure S1. MASTL expression correlates with  $\beta$ 3-integrin (ITGB3)-positive breast cancers, Related to Figure 1.** **A)** Patient median age, breast tumour size, Ki-67 expression, histological grade/type, p53 expression, and axillary nodal status among MASTL-negative and -positive patients in the FinHer series. **B)** Tumour size, axillary nodal status, histological type/grade, hormone receptor (ER, PR) expression, HER2 status, Ki-67 expression, and p53 expression among ITGB3-negative and -positive patients. **C)** Survival of FinHer patients with negative (MASTL<sup>-</sup>), or high (MASTL<sup>+</sup>) MASTL expression. Kaplan–Meier survival-table method and log-rank test.

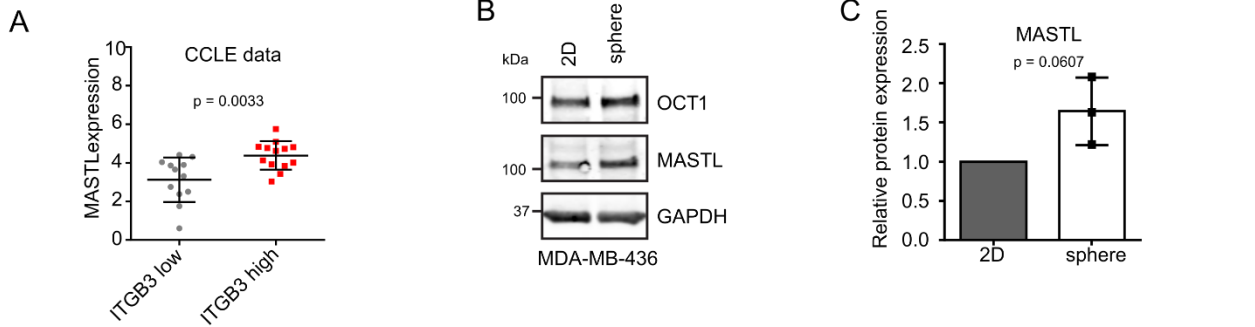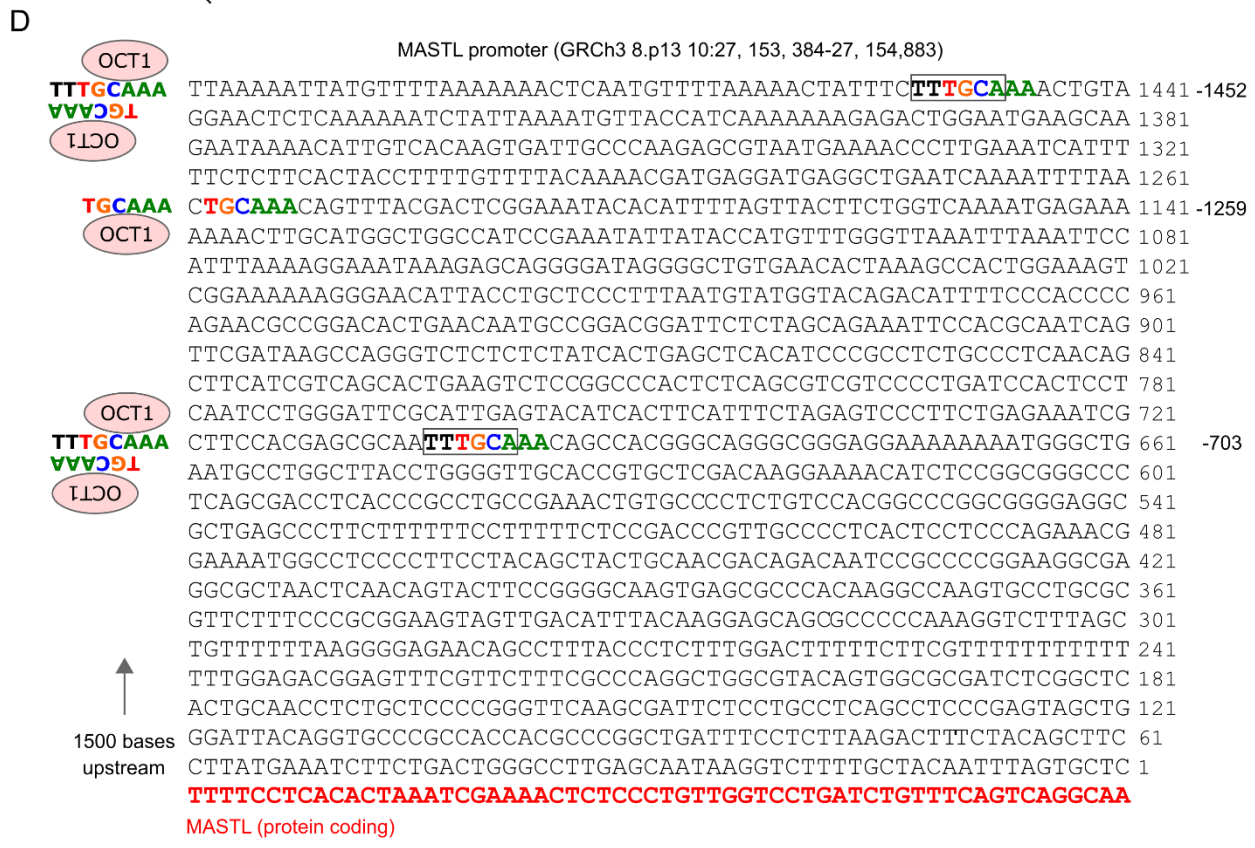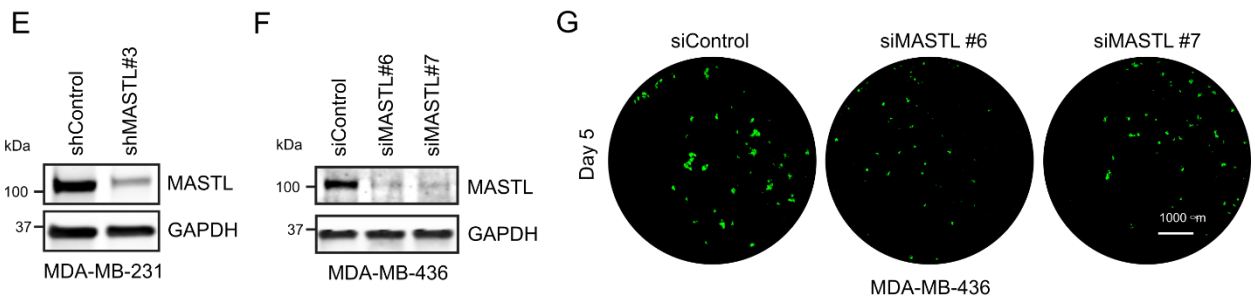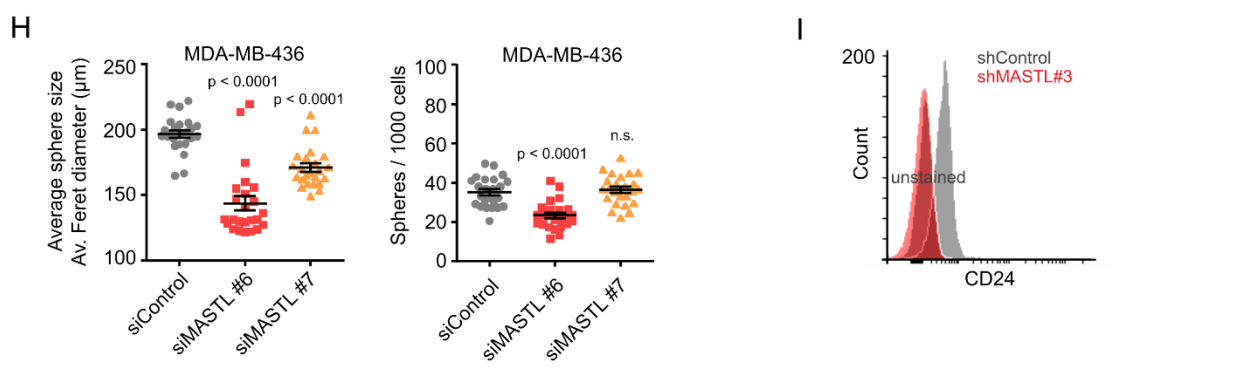

**Figure S2. High MASTL levels correlate with OCT1 and mammosphere formation, Related to Figure 2.** **A)** MASTL expression in breast cancer cell lines with high or low ITGB3 expression based on Cancer Cell Line Encyclopedia (CCLE) data, unpaired t-test. **B)** Western blotting of OCT1, MASTL, and GAPDH in MDA-MB-436 cells grown as a monolayer (2D) or in mammosphere culture conditions. **C)** Relative protein expression of MASTL to GAPDH, experimental setup shown in A. (n=3 biologically independent experiments, unpaired t-test, mean  $\pm$  SD). **D)** Predicted binding sites for OCT1 in the promoter region of MASTL based on the consensus binding sequence TGCAAA. **E)** Western blotting of MASTL and GAPDH in tetracycline-inducible shControl or shMASTL#3 MDA-MB-231 cells pretreated with tetracycline (1  $\mu$ g/ml) for 5 days. **F)** Western blotting of MASTL and GAPDH in siControl, siMASTL#6 and siMASTL#7 treated MDA-MB-436 cells after 48 hours. **G)** Representative images of siControl, siMASTL#6 and siMASTL#7 treated MDA-MB-436 cells grown 5 days in mammosphere culture conditions and stained with Calcein (Nikon Eclipse Ti-E widefield microscope, Hamamatsu Orca C13440 Flash 4.0 ERG [b/w] sCMOS camera and Plan Apo lambda 20 $\times$ /0.80, WD 1,000- $\mu$ m objective). **H)** Average mammosphere size (average ferret diameter of spheres in  $\mu$ m) and sphere number/1000 cells plated, experimental setup shown in E. (n=3 biologically independent experiments, 8 replicate wells/experiment, unpaired t-test, mean  $\pm$  SEM). **I)** Representative flow cytometry histograms of CD24 expression in tetracycline-induced (4 days) shControl and shMASTL#3 MDA-MB-231 cells.

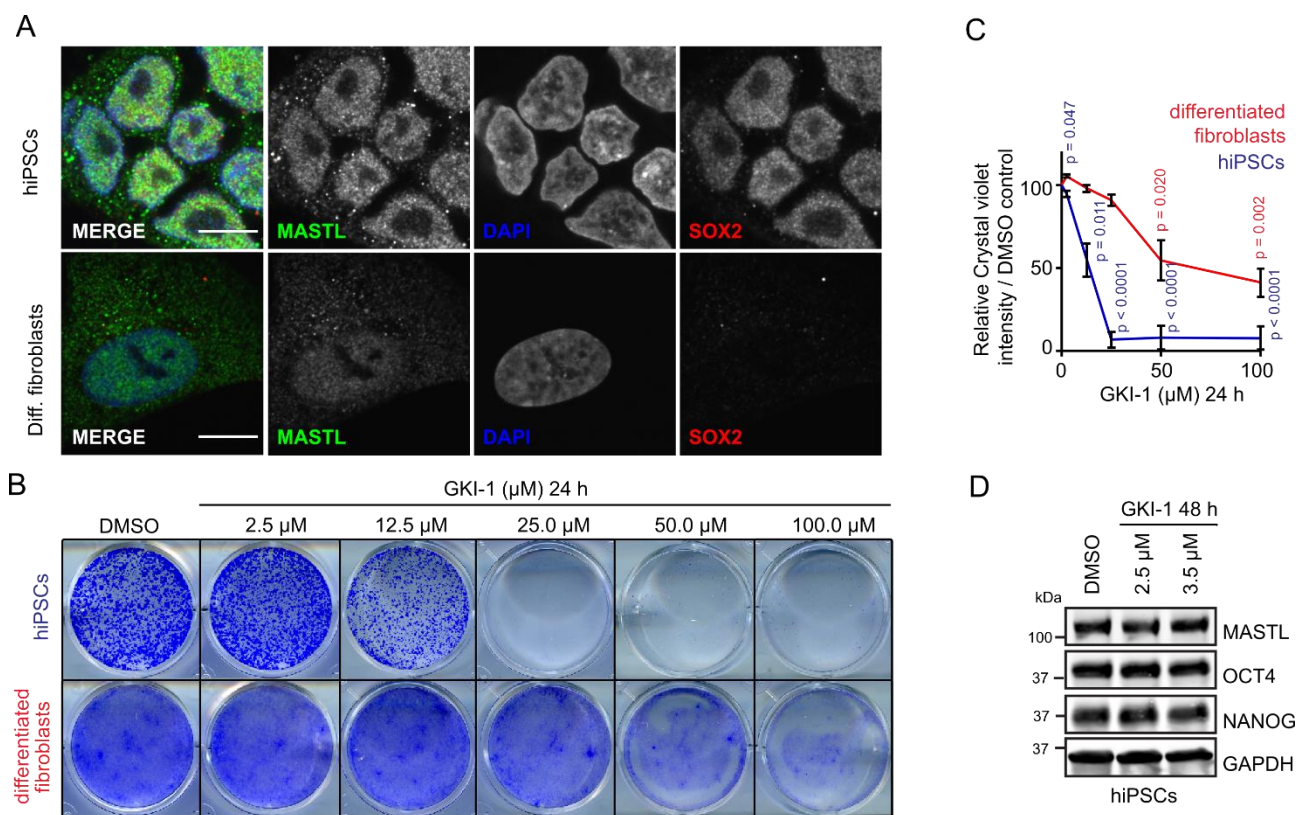

**Figure S3. MASTL is highly expressed in pluripotent stem cells and supports pluripotency, Related to Figure 3.** **A)** Immunostaining of MASTL, SOX2 (pluripotency indicator), and DAPI in hiPSCs and in differentiated fibroblasts, Scale bar, 10  $\mu$ m. **B)** Crystal violet staining of hiPSC colonies and differentiated fibroblasts treated with DMSO or GKI-1 (2.5-100  $\mu$ M) for 24h. **C)** Relative Crystal violet intensity, experimental setup shown in E. (n=3 biologically independent experiments, unpaired t-test, mean  $\pm$  SEM). **D)** Western blotting of MASTL, OCT4, NANOG, and GAPDH in hiPSCs treated with DMSO or GKI-1 (2.5-3.5  $\mu$ M) for 48h.

A

| Gene name | mRNA  | total proteome | surfaceome | Protein name                                 |
|-----------|-------|----------------|------------|----------------------------------------------|
| SLC2A3    | -2.22 | -2.22          | -1.85      | GLUT3                                        |
| ESAM      | -0.96 | -0.98          | -0.94      | Endothelial cell-selective adhesion molecule |
| ANO6      | N.A   | N.A            | -0.87      | Anoctamin-6                                  |
| TUBB6     | -0.53 | -0.71          | -0.83      | Tubulin beta-6 chain                         |
| FZD6      | N.A   | -0.71          | -0.81      | Frizzled-6                                   |
| SLC44A1   | -0.50 | -0.71          | -0.73      | Choline transporter-like protein 1           |
| ICAM1     | N.A   | -0.63          | -0.69      | intercellular adhesion molecule 1            |
| ATP2A2    | -0.95 | -0.79          | -0.67      | endoplasmic reticulum calcium ATPase2        |
| SLC20A1   | N.A   | -0.66          | -0.67      | sodium-dependent phosphate transporter 1     |
| TGFBR2    | -0.74 | -0.61          | -0.61      | TGF-beta receptor type-2                     |
| IPO5      | -0.83 | -0.61          | -0.57      | Importin-5                                   |
| SUSD5     | N.A   | N.A            | 0.62       | Sushi domain-containing protein 5            |
| PLXDC2    | N.A   | 0.84           | 0.68       | Plexin domain-containing protein 2           |
| INSR      | N.A   | N.A            | 0.69       | Insulin receptor                             |
| F11R      | N.A   | N.A            | 0.69       | Junctional adhesion molecule A               |
| EPHA4     | N.A   | N.A            | 0.97       | Ephrin type-A receptor                       |

**Figure S4. MASTL depletion influences stem-cell-associated surface proteins, Related to Figure 4.** A) Comparison of the significantly altered surface proteins, surfaceome (SILAC siMastl/siControl Ratio  $>0.5/<-0.5$ ) to previously published (Taskinen et al., 2020) transcriptional changes, mRNA, (FDR  $< 0.05$ ) measured with Illumina HT-12 and total protein levels, proteome (SILAC siMastl/siControl Ratio ( $\log_2$ )  $>0.5/<-0.5$ ) in MASTL-silenced cells. N.A (not applicable based on the parameters set in the analysis).

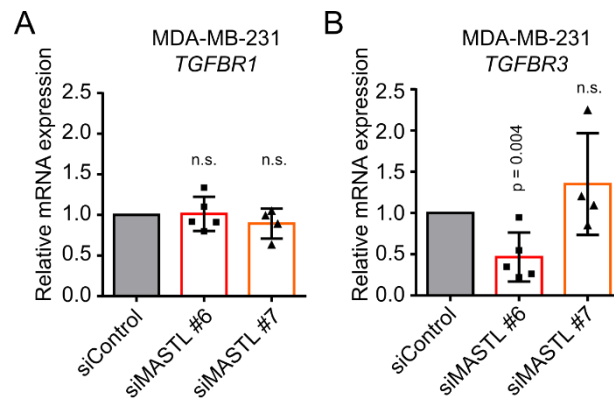

**Figure S5. MASTL effect on TGFBR1 and TGFBR3, Related to Figure 5.** A-B) Relative mRNA expression of TGFBR1 or TGFBR3 in siControl, siMASTL#6 and siMASTL#7 treated MDA-MB-231 cells after 48 hours (n=4-5 biologically independent experiments, unpaired t-test, mean  $\pm$  SD).
